# Supplementary material for: A TaqMan Probe-Based Multiplex Real-Time PCR for Simultaneous Detection of Porcine Epidemic Diarrhea Virus Subtypes G1 and G2, and Porcine Rotavirus Groups A and C
Source: MDPI journal article supplement (doi:10.3390/v14081819), 2022-08-19
Supplement: s1 [file s1]

# **A *Taq*Man Probe-Based Multiplex Real-Time PCR for Simultaneous Detection of Porcine Epidemic Diarrhea Virus Subtypes G1 and G2, and Porcine Rotavirus Groups A and C**

**Letian Zhang <sup>1,†</sup>, Zhiwen Jiang <sup>1,†</sup>, Zitong Zhou <sup>1</sup>, Jiumeng Sun <sup>1</sup>, Shiyu Yan <sup>1</sup>, Wenting Gao <sup>1</sup>, Yuekun Shao <sup>1</sup>, Yuhe Bai <sup>1</sup>, Yifan Wu <sup>1</sup>, Zefei Yan <sup>1</sup>, Shouzhi Sheng <sup>1</sup>, Alexander Lai <sup>2</sup> and Shuo Su <sup>1,\*</sup>**

<sup>1</sup> Jiangsu Engineering Laboratory of Animal Immunology, Institute of Immunology, College of Veterinary Medicine, Nanjing Agricultural University, Nanjing 210095, China

<sup>2</sup> School of Science, Technology, Engineering, and Mathematics, Kentucky State University, Frankfort, KY 40601, USA

\* Correspondence: shuosu@njau.edu.cn

† These authors contributed equally to this work.

**Table S1. Repeatability of the duplex real-time PCR assay.**

| Plasmid     | Concentration<br>(copies/μL) | Intra-assay Ct value |                 |                 | Inter-assay Ct value | CV%   |
|-------------|------------------------------|----------------------|-----------------|-----------------|----------------------|-------|
|             |                              | Group1(average)      | Group2(average) | Group3(average) | Mean±SD              |       |
| PEDV-<br>G1 | 10 <sup>1</sup>              | 33.66                | 32.41           | 32.05           | 32.71±0.69           | 2.11% |
|             | 10 <sup>2</sup>              | 30.94                | 31.04           | 30.58           | 30.85±0.20           | 0.65% |
|             | 10 <sup>3</sup>              | 27.87                | 27.55           | 27.03           | 27.48±0.35           | 1.27% |
|             | 10 <sup>4</sup>              | 24.44                | 24.12           | 23.65           | 24.07±0.32           | 1.33% |
|             | 10 <sup>5</sup>              | 21.05                | 20.87           | 20.48           | 20.80±0.24           | 1.15% |
|             | 10 <sup>6</sup>              | 17.49                | 17.43           | 17.10           | 17.34±0.17           | 0.98% |
|             | 10 <sup>7</sup>              | 14.05                | 13.77           | 13.80           | 13.87±0.13           | 0.94% |
| PEDV-<br>G2 | 10 <sup>2</sup>              | 34.03                | 34.50           | 34.34           | 34.29±0.20           | 0.58% |
|             | 10 <sup>3</sup>              | 31.33                | 32.08           | 31.04           | 31.48±0.44           | 1.40% |
|             | 10 <sup>4</sup>              | 28.29                | 28.80           | 28.12           | 28.40±0.29           | 1.02% |
|             | 10 <sup>5</sup>              | 24.73                | 25.51           | 25.11           | 25.12±0.32           | 1.27% |
|             | 10 <sup>6</sup>              | 21.37                | 22.06           | 21.38           | 21.60±0.32           | 1.48% |
|             | 10 <sup>7</sup>              | 18.34                | 18.10           | 17.63           | 18.02±0.29           | 1.61% |
| RVA         | 5×10 <sup>1</sup>            | 33.09                | 33.13           | 33.35           | 33.19±0.12           | 0.36% |
|             | 10 <sup>2</sup>              | 32.82                | 32.93           | 32.91           | 32.89±0.05           | 0.15% |
|             | 10 <sup>3</sup>              | 29.23                | 30.06           | 29.98           | 29.76±0.37           | 1.24% |
|             | 10 <sup>4</sup>              | 26.38                | 26.89           | 26.83           | 26.70±0.23           | 0.86% |
|             | 10 <sup>5</sup>              | 22.97                | 23.45           | 23.49           | 23.30±0.24           | 1.03% |
|             | 10 <sup>6</sup>              | 19.68                | 20.90           | 19.92           | 20.17±0.53           | 2.63% |
|             | 10 <sup>7</sup>              | 16.26                | 17.42           | 16.94           | 16.88±0.48           | 2.84% |

|     |                   |       |       |       |            |       |
|-----|-------------------|-------|-------|-------|------------|-------|
| RVC | 5×10 <sup>1</sup> | 34.21 | 34.31 | 34.27 | 34.26±0.04 | 0.12% |
|     | 10 <sup>2</sup>   | 33.03 | 33.62 | 33.39 | 33.35±0.24 | 0.72% |
|     | 10 <sup>3</sup>   | 30.30 | 30.01 | 30.26 | 30.19±0.13 | 0.43% |
|     | 10 <sup>4</sup>   | 27.24 | 27.31 | 27.03 | 27.19±0.12 | 0.44% |
|     | 10 <sup>5</sup>   | 23.10 | 23.45 | 23.53 | 23.36±0.19 | 0.80% |
|     | 10 <sup>6</sup>   | 19.99 | 19.38 | 19.86 | 19.74±0.26 | 1.33% |
|     | 10 <sup>7</sup>   | 15.54 | 15.09 | 15.32 | 15.32±0.18 | 1.20% |

**SD=Standard Deviation**

**Table S2. Conformity of detection from co-infection clinical specimens**

| Results of co-infection | Number of samples | Conformity rate between the two methods |
|-------------------------|-------------------|-----------------------------------------|
| PEDV-G1+RVC             | 1                 | 100%                                    |
| PEDV-G2+RVA             | 5                 | 100%                                    |
| RVA+RVC                 | 3                 | 100%                                    |
| PEDV-G2+RVA+RVC         | 1                 | 100%                                    |
